# Supplementary material for: OsbHLH073 Negatively Regulates Internode Elongation and Plant Height by Modulating GA Homeostasis in Rice
Source: PubMed Central journal article supplement (PMC7238965; doi:10.3390/plants9040547), 2020-04-23
Supplement: plants-09-00547-s001.pdf [file plants-09-00547-s001.pdf]

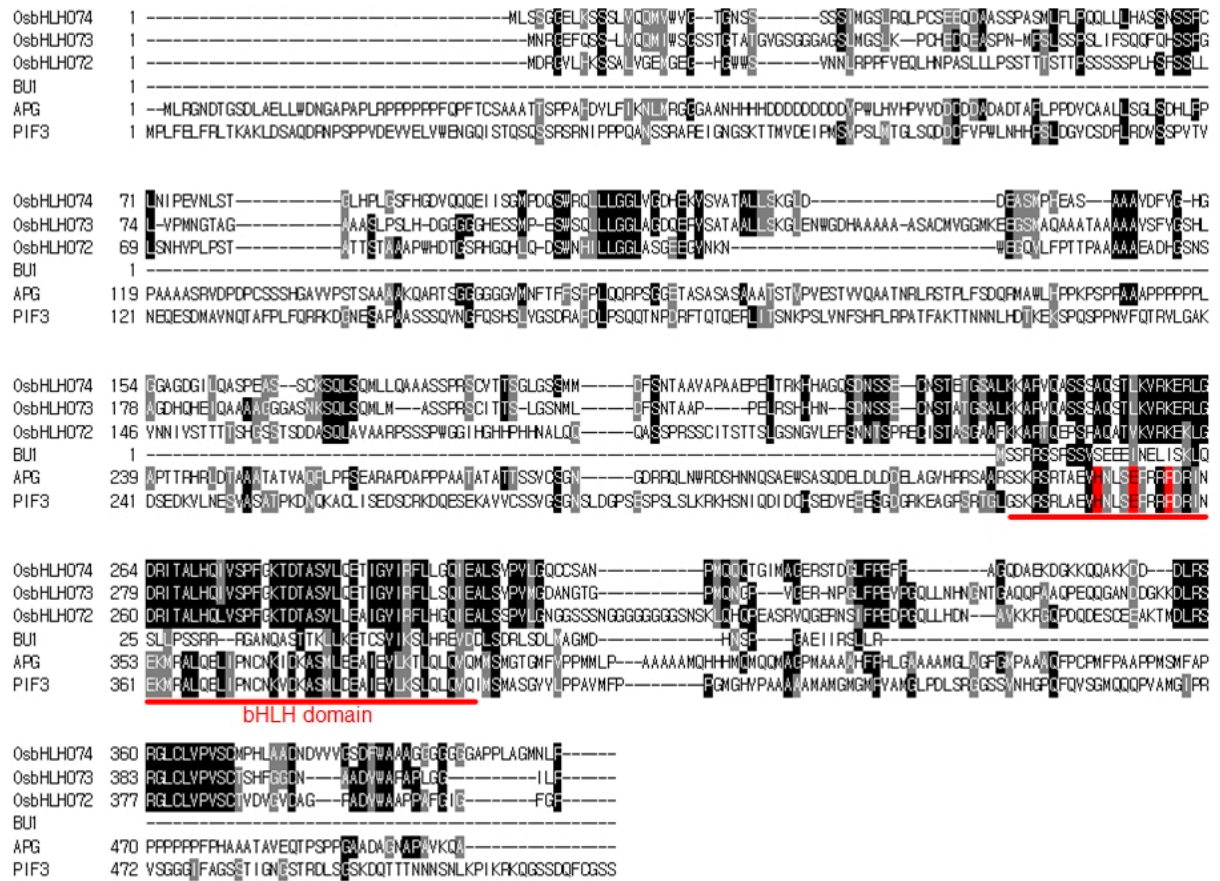

**Figure S1. Multiple sequence alignment of bHLH transcription factors.** The red shades refer to conserved amino acid sequence found in the typical bHLH domains. Underline indicates bHLH domain.

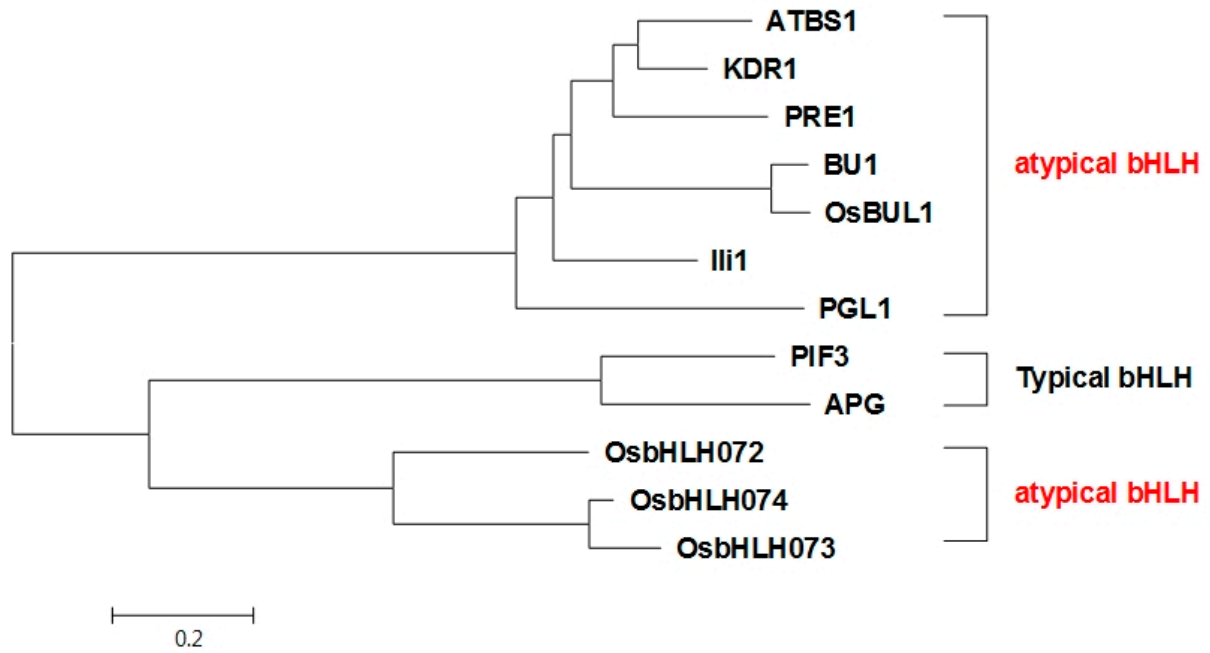

**Figure S2. Phylogenetic tree of atypical and typical bHLH transcription factors from rice and Arabidopsis.** Full-length amino acid residues were used from ATBS1 (AT1g74500), KDR1 (At1g26945), PRE1 (At5g39860), BU1 (Os06g12210), OsBUL1 (Os02g51320), Ili1 (Os04g54900), PGL1 (Os03g07510), PIF3 (AT1G09530) APG (Os05g04740), OsbHLH072 (Os05g14010), OsbHLH074 (Os01g13000), and OsbHLH073 (Os02g17680). Phylogenetic analyses were conducted with ClustalW and MEGA 7.0. Tree was generated by Neighbor-joining method.

```

Os bHLH074 1 MLSSGGELKSSSLVQQMVVWG--TGNSS-----SSSIMGSLRQLPCSEEQDAASPPAS
Os bHLH073 1 --MNRGEFOSS-LVQQMTWSGSSTGTATGVGSGGGAGSLMGSLLK--PCHEDQEASPN-MP
Os bHLH072 1 --MDRGVLHKSSALVGEVGEV--HGWS-----VNNLRPPFVEQLHNPASLLLPSTL

Os bHLH074 52 MLFLPQQLLHASNSNSPCLNIPVNLSTLHPLGSPHGDVQQQEIISGMPDQSWRQLLL
Os bHLH073 55 SLSSPSLIFSQQFQHSPPGL-VPMNGTAGAAASLPSLH-DGGGGGHESMP-ESWSQLLL
Os bHLH072 50 TSITPSSSSSPLHSFSSLLLSNHYPSTATTSTAAAPWHDTGSRHGQHLQ-DSWNHILL

Os bHLH074 112 GGLVGDHEKYSVATAALLSKGLD-----DEASMPHEAS---AAAYD
Os bHLH073 112 GGLAGDCERYSAATAALLSKGLEHWGDHAAAAAASACMVGGMKKEGSMQAQAAATAAAAAYS
Os bHLH072 109 GGLASGEEGYNKN-----WEGOVLFPTTIPAAAAAEA

Os bHLH074 149 FYG-HGGGAGDGILQASPEAS--SCKSOLSQMLLQAPASSPRSCVTTSGLGSSMDFSNL
Os bHLH073 172 FYGSHLAGDHOHEIQAAAAGGGASNKSOLSQMLL---ASSPRSCITTS-LGSNMLDFSNL
Os bHLH072 140 DHGNSYNNIYSTTTTSHGSSSTDDASQLAVAARPSSSPWGGIHGHPHNNALQQQASSP

Os bHLH074 206 AAVAPAAEPELTRKHHAGQSDNSSE--CNSTETGSALKKARVOASSAQSTLKVRKERLG
Os bHLH073 228 AAP-----PELRSHHHN--SDNSSE--CNSTATGSALKKARVOASSAQSTLKVRKERLG
Os bHLH072 200 RSSCITSTTSLGSGVLEFSNNTSPRECI STASGAAKKKARTCEPSPACATVKVRKEKLG
                                                                 bHLH domain

Os bHLH074 264 DRITALHQIVSPFGKTDASVLQETIGYIRFLLGQIEALSYPYLGCCSAN-----
Os bHLH073 279 DRITALHQIVSPFGKTDASVLQETIGYIRFLSQIEALSYPYMGDANGTG-----
Os bHLH072 260 DRITALHQIVSPFGKTDASVLEAIGYIRFLHGQIEALSYPYLGNGGSSSSNGGGGGGGG

Os bHLH074 315 ---PMCCCTGIMAGERSTDGLFPEFP-----AGQDAEKDGKKQQAQKDD---DLRS
Os bHLH073 330 ---PMONGP---VGER-NEGLFPEYPGQLLNHNGNTGAQQPFAQPEQQGANDDGKKDLRS
Os bHLH072 320 SNSKIQHOPEASRVQGERNSIFPEDPGQLLDN---AVKKRGPQDQDESCEAKTMDLRS

Os bHLH074 360 RGLCLVPVSCMPHLAADNDVVVGSDFWAAAGGGGGGAPPLAGMNL
Os bHLH073 383 RGLCLVPVSCTSHEGGDN----PADYWAAPPLGG-----ILR
Os bHLH072 377 RGLCLVPVSCITVDVGVDAG---PADYWAAPPEGIGFCR-----

```

Figure S3. Multiple sequence alignment of OsbHLH072, OsbHLH073, and OsbHLH074 proteins. Black shade indicates identical amino acid and gray shade indicates similar amino acids. Underline indicates bHLH domain.





> OsKO2 (LOC\_Os06g37300) promoter region (~2 kb from ATG)

attggctaagggtgtgttttagttcgcgaaaaggatgattagaaggaaatatatcctatgtacataaacttctcgtac  
acactccatgcatatcaaatag**caaatg**ccatagaaaattctagaaaaatcggacaaataactaaaaatcttagttct  
ctgattggaaattatgttgcgaagtttttttctacttttaagacgccagttactgattatgaataaataaaagaaaagg  
gacatcatctgctatcccactatcatatcggagttgagagagcggagataaagaaaggatggagatggtcatcagt  
gtcattcctcccacttccgggacgggtgacgaggaagcgcctcaagcgggtgccaaatccgatggccaaggatctcgg  
ggttcaaatccaccacggacaagcaacgaagacaagtaacggagtttcaaatccccatattgtgtgaactatga  
agttctgattttgatcgaatgaccgcttctcctcgcctatgaccctaggcaagaggaggaggaggaccaggaa  
actttatcgatactatgctattagccattaatacga**cacatgtg**ccacgtctaaaactgaatttgggtaggcaagttt  
caccataagaaatctaaa**caattg**agtatgctcactttacagttatataacttttaattaaccggtccaatggtcatat  
cttagttttattttgaatggcgtagttcctataataatattattataaaatatatgtgtttctattcggatttttagtctgcatatt  
gttgcagggaaggagataaggatttgcacataactcgtatcttttattatcttttaaaacttfgaccgtgtttatattg  
acagagatactgttttattataaaaattgatcgggccttaataaaaactatcatggcggactaattataacttctgtg  
ttattttttaaggcaactaatatggtcgacactagataaagaactgacgtaaaacttttgagtgaactttcaaatat  
aactactatagtgaattccaatataactataactataactactaaaaatttatgtaactgtatataataagtaaaa  
atgcatgacattatagtaagttatataataaaaggtatatagttatagtgaattacactgctgcatatcaatattac  
accacagttacattgaaaaatctttaagtcgatatttagcaattac**caagtg**ggtaataataacgaggagaacagca  
aaagtaattagtcgaaactcgaat**caggtg**tacttgcatatgggtattacttggcataaaggctggtcttaattca  
aag**cacgtg**agctgaccgcgcgatgaatacctactacta**catgtg**gctccaaggagtacagaagaataaac  
gcaaataatgaatgtgcaagcgtatgtgtacatggccctaccaacaatgacgacaacgacactacaagaacga  
cgtaataatttttaattgaggtagctgcta**cacgtg**ttaaattgtattacaaagctcttaaaaaaataatgatataattcacat  
cgtgaaacaaagtgatgtaagacttttttttaagaatagtacgtatagacttattattctagtgtttgaaagaa  
gaaagaagattaagaaaataaacattaaatgatgtaattaagtattaatttttaacataaaaaacaaattagtg  
aatttattatagaaaaaattataaaaagaaaaatgatgattactactcctcctccaataaaaaatctatcagagggtg  
tttaagggagtact**cacgtg**gaaagggagcgaacctctctcttctctagcaacaacggctgaacgcagccaa  
aaagcaacaaaaaagacttcaagttggtacagcagcagcgcgccctttcttatttctcgtctctcagcgtgctgc  
ggcctctataaataagaaagccgggattaattaagagtgctgtgatcagatcgtgtgc**ATG**

**Figure S5.** Information of *OsKO2* promoter region from start codon (ATG). We manually found E-boxes in the promoter regions using conserved nucleotide sequences. Red letter indicate predicted E-box sites.

**Table S1. Primers used in this study**

| Name                   | Primer sequence (5'→3')          | Remarks                        |
|------------------------|----------------------------------|--------------------------------|
| <i>CPS1-qF</i>         | GCGTGCATTTTCGAACCAA              | qPCR                           |
| <i>CPS1-qR</i>         | TTGGCCAGCACTGACACTCT             | qPCR                           |
| <i>GA20ox1-qF</i>      | GCCACTACAGGGCCGACAT              | qPCR                           |
| <i>GA20ox1-qR</i>      | TGGTTGCAGGTGACGATGAT             | qPCR                           |
| <i>GA20ox2-qF</i>      | CCAATTTTGGACCTACCGC              | qPCR                           |
| <i>GA20ox2-qR</i>      | GAGAGAAGCCCAACCCAACC             | qPCR                           |
| <i>GA3ox2-qF</i>       | TCCTCCTTCTTCTCCAAGCTCAT          | qPCR                           |
| <i>GA3ox2-qR</i>       | GAAACTCCTCCATCACGTCACA           | qPCR                           |
| <i>GA2ox1-qF</i>       | TGACGATGATGACAGCGACAA            | qPCR                           |
| <i>GA2ox1-qR</i>       | CCATAGGCATCGTCTGCAATT            | qPCR                           |
| <i>GA2ox3-qF</i>       | TGGTGGCCAACAGCCTAAAG             | qPCR                           |
| <i>GA2ox3-qR</i>       | TGGTGCAATCCTCTGTGCTAAC           | qPCR                           |
| <i>Slr1-qF</i>         | CTTCGAGCCCCGTGCACCTGG            | qPCR                           |
| <i>Slr1-qR</i>         | CCGTAAGCCCCGATCGGTCCG            | qPCR                           |
| <i>KO1-qF</i>          | AGTAGCCAAGGAGGCGATGA             | qPCR                           |
| <i>KO1-qR</i>          | CGGCTTATCACAGACAATGCT            | qPCR                           |
| <i>KO2-qF</i>          | TGAAGTAGCCAAGGAGGCGA             | qPCR                           |
| <i>KO2-qR</i>          | CGCTGATTGCGACCATACTTT            | qPCR                           |
| <i>OsHHLH073-qF3</i>   | CCTCCTCTTCAGCACAATCTAC           | qPCR                           |
| <i>OsHHLH073-qR3</i>   | GCCAATGGTCTCTTGCGAGTA            | qPCR                           |
| <i>Actin-qF</i>        | CAGCCACACTGTCCCCATCTA            | qPCR                           |
| <i>Actin-qR</i>        | AGCAAGGTCGAGACGAAGGA             | qPCR                           |
| <i>OsHHLH073-OE-F1</i> | GTTAACatgaatagaggagaattccagagctc | Overexpression, Localization   |
| <i>OsHHLH073-OE-R1</i> | ACTAGTGGTACCcctgtagatcccgcgag    | Overexpression, Localization   |
| 4A-02508-F             | TTACCCCTAGGTACAGGGGTG            | <i>OsHHLH073-D</i> genotyping  |
| 4A-02508-R             | TACTGTAATAAGCAAGCCGGC            | <i>OsHHLH073-D</i> genotyping  |
| LB                     | CTAGAGTCGAGAATTCAGTACA           | T-DNA border for genotyping    |
| 3A-17056-F             | GCGTCTGTACTGCAAGAGACC            | <i>OsHHLH073</i> KO-Genotyping |
| 3A-17056-R             | AATACCGGATGTGACACATTC            | <i>OsHHLH073</i> KO-Genotyping |
| 5A-00405-F             | GAGCAACTGGTCCTCCCTG              | <i>OsHHLH074</i> KO-Genotyping |
| 5A-00405-R             | CAATTTGCAAAACGCCTCTAC            | <i>OsHHLH074</i> KO-Genotyping |
| <i>OsHHLH073-RT-F1</i> | CCTCCTCTTCAGCACAATCTAC           | RT-PCR for <i>OsHHLH073</i>    |
| <i>OsHHLH073-RT-F1</i> | GTAAGGTTGATTGCTCTTGATGC          | RT-PCR for <i>OsHHLH073</i>    |
| <i>OsHHLH074-RT-F1</i> | CATGCAGGCCAGTCAGATAA             | RT-PCR for <i>OsHHLH074</i>    |
| <i>OsHHLH074-RT-F1</i> | TCAGGTCGTCGTCCTTCTTC             | RT-PCR for <i>OsHHLH074</i>    |
| <i>Actin-RT-F1</i>     | AGGCTCCTCTCAACCCCAAGGCCAATCG     | RT-PCR for <i>OsActin</i>      |

|                    |                           |                           |
|--------------------|---------------------------|---------------------------|
| <i>Actin-RT-R1</i> | AGGTAATCAGTGAGATCACGCCAGC | RT-PCR for <i>OsActin</i> |
|--------------------|---------------------------|---------------------------|
